# Supplementary material for: Why articles are retracted: a retrospective cross-sectional study of retraction notices at BioMed Central
Source: PubMed Central journal article supplement — BMJ Open. 2016 Nov 23;6(11):e012047. doi: 10.1136/bmjopen-2016-012047 (PMC5168538; doi:10.1136/bmjopen-2016-012047), 2016-11-23
Supplement: bmjopen-2016-012047supp_file1.pdf [file bmjopen-2016-012047supp_file1.pdf]

| link to retraction notice                                                                                                                                                                   | Citations before retraction (in Scopus) | Citations after retraction (in Scopus) | retraction cited? | Journal                                                        | date article published | date retraction posted | # days between publication and retraction | Reason for retraction      | Who retracted      | year retraction posted |
|---------------------------------------------------------------------------------------------------------------------------------------------------------------------------------------------|-----------------------------------------|----------------------------------------|-------------------|----------------------------------------------------------------|------------------------|------------------------|-------------------------------------------|----------------------------|--------------------|------------------------|
| <a href="http://www.arthritis-research.com/content/17/1/354">http://www.arthritis-research.com/content/17/1/354</a>                                                                         | 49                                      | 2                                      | 0                 | <i>Arthritis Research &amp; Therapy</i>                        | 20/09/2011             | 09/12/2015             | 1541                                      | data fabrication           | authors            | 2015                   |
| <a href="http://www.scoliosisjournal.com/content/10/1/34">http://www.scoliosisjournal.com/content/10/1/34</a>                                                                               | 0                                       | 1                                      | 0                 | <i>Scoliosis</i>                                               | 12/06/2015             | 03/12/2015             | 174                                       | published in error         | authors and editor | 2015                   |
| <a href="http://www.jneuroinflammation.com/content/12/1/220">http://www.jneuroinflammation.com/content/12/1/220</a>                                                                         | 7                                       | 3                                      | 0                 | <i>Journal of Neuroinflammation</i>                            | 22/01/2014             | 26/11/2015             | 673                                       | data fabrication           | Editor             | 2015                   |
| <a href="http://bmcophthalmol.biomedcentral.com/articles/10.1186/s12886-015-0114-z">http://bmcophthalmol.biomedcentral.com/articles/10.1186/s12886-015-0114-z</a>                           | 3                                       | 2                                      | 0                 | <i>BMC Ophthalmology</i>                                       | 09/04/2013             | 16/11/2015             | 951                                       | duplicate publication      | Editor             | 2015                   |
| <a href="http://bmcevolbiol.biomedcentral.com/articles/10.1186/s12862-015-0513-z">http://bmcevolbiol.biomedcentral.com/articles/10.1186/s12862-015-0513-z</a>                               | 830                                     | 12                                     | 0                 | <i>BMC Evolutionary Biology</i>                                | 28/06/2004             | 05/11/2015             | 4147                                      | breach of editorial policy | Editor             | 2015                   |
| <a href="http://bmcgenomics.biomedcentral.com/articles/10.1186/s12864-015-1802-z">http://bmcgenomics.biomedcentral.com/articles/10.1186/s12864-015-1802-z</a>                               | 2                                       | 1                                      | 0                 | <i>BMC Genomics</i>                                            | 11/12/2014             | 03/08/2015             | 235                                       | data unreliable            | authors            | 2015                   |
| <a href="http://particleandfibretoxicology.biomedcentral.com/articles/10.1186/s12989-015-0097-1">http://particleandfibretoxicology.biomedcentral.com/articles/10.1186/s12989-015-0097-1</a> | 23                                      | 6                                      | 0                 | <i>Particle and Fibre Toxicology</i>                           | 13/02/2013             | 14/07/2015             | 881                                       | data fabrication           | Editor             | 2015                   |
| <a href="http://particleandfibretoxicology.biomedcentral.com/articles/10.1186/s12989-015-0098-0">http://particleandfibretoxicology.biomedcentral.com/articles/10.1186/s12989-015-0098-0</a> | 1                                       | 4                                      | 0                 | <i>Particle and Fibre Toxicology</i>                           | 12/09/2014             | 14/07/2015             | 305                                       | data fabrication           | Editor             | 2015                   |
| <a href="http://diagnosticpathology.biomedcentral.com/articles/10.1186/s13000-015-0240-1">http://diagnosticpathology.biomedcentral.com/articles/10.1186/s13000-015-0240-1</a>               | 0                                       | 1                                      | 1                 | <i>Diagnostic Pathology</i>                                    | 01/07/2014             | 26/03/2015             | 268                                       | compromised peer review    | Publisher & Editor | 2015                   |
| <a href="http://cancerjournal.biomedcentral.com/articles/10.1186/s12935-015-0199-8">http://cancerjournal.biomedcentral.com/articles/10.1186/s12935-015-0199-8</a>                           | 0                                       | 1                                      | 0                 | <i>Cancer Cell International</i>                               | 19/12/2014             | 24/06/2015             | 187                                       | compromised peer review    | Publisher & Editor | 2015                   |
| <a href="http://bmcmsculoskeletaldisorders.biomedcentral.com/articles/10.1186/s12891-015-0462-0">http://bmcmsculoskeletaldisorders.biomedcentral.com/articles/10.1186/s12891-015-0462-0</a> | 4                                       | 1                                      | 0                 | <i>BMC Musculoskeletal Disorders</i>                           | 17/11/2009             | 19/06/2015             | 2040                                      | plagiarism                 | Editor             | 2015                   |
| <a href="http://diagnosticpathology.biomedcentral.com/articles/10.1186/s13000-015-0237-9">http://diagnosticpathology.biomedcentral.com/articles/10.1186/s13000-015-0237-9</a>               | 0                                       | 1                                      | 0                 | <i>Diagnostic Pathology</i>                                    | 26/09/2014             | 13/05/2015             | 229                                       | compromised peer review    | Publisher & Editor | 2015                   |
| <a href="http://aacijournal.biomedcentral.com/articles/10.1186/s13223-015-0079-8">http://aacijournal.biomedcentral.com/articles/10.1186/s13223-015-0079-8</a>                               | not in scopus                           | ?                                      | ?                 | <i>Allergy, Asthma &amp; Clinical Immunology</i>               | 18/12/2014             | 17/04/2015             | 120                                       | duplicate publication      | authors            | 2015                   |
| <a href="http://jehse.biomedcentral.com/articles/10.1186/s40201-015-0182-2">http://jehse.biomedcentral.com/articles/10.1186/s40201-015-0182-2</a>                                           | 0                                       | 1                                      | 0                 | <i>Journal of Environmental Health Science and Engineering</i> | 27/12/2014             | 17/04/2015             | 111                                       | duplicate publication      | Editor             | 2015                   |

|                                                                                                                                                                                     |    |   |   |                                               |            |            |      |                         |                    |      |
|-------------------------------------------------------------------------------------------------------------------------------------------------------------------------------------|----|---|---|-----------------------------------------------|------------|------------|------|-------------------------|--------------------|------|
| <a href="http://rbej.biomedcentral.com/articles/10.1186/s12958-015-0016-1">http://rbej.biomedcentral.com/articles/10.1186/s12958-015-0016-1</a>                                     | 13 | 1 | 0 | <i>Reproductive Biology and Endocrinology</i> | 16/12/2003 | 03/04/2015 | 4126 | data fabrication        | Editor             | 2015 |
| <a href="http://www.eurjmedres.com/content/20/1/44">http://www.eurjmedres.com/content/20/1/44</a>                                                                                   | 15 | 1 | 0 | <i>European Journal of Medical Research</i>   | 30/07/2013 | 31/03/2015 | 609  | compromised peer review | Publisher & Editor | 2015 |
| <a href="http://www.cardiothoracicsurgery.org/content/10/1/42">http://www.cardiothoracicsurgery.org/content/10/1/42</a>                                                             | 0  | 1 | 0 | <i>Journal of Cardiothoracic Surgery</i>      | 05/12/2014 | 27/03/2015 | 112  | compromised peer review | Publisher & Editor | 2015 |
| <a href="http://www.cardiothoracicsurgery.org/content/10/1/43">http://www.cardiothoracicsurgery.org/content/10/1/43</a>                                                             | 6  | 2 | 0 | <i>Journal of Cardiothoracic Surgery</i>      | 28/02/2014 | 27/03/2015 | 392  | compromised peer review | Publisher & Editor | 2015 |
| <a href="http://diagnosticpathology.biomedcentral.com/articles/10.1186/s13000-015-0239-7">http://diagnosticpathology.biomedcentral.com/articles/10.1186/s13000-015-0239-7</a>       | 0  | 1 | 0 | <i>Diagnostic Pathology</i>                   | 17/06/2013 | 26/03/2015 | 647  | compromised peer review | Publisher & Editor | 2015 |
| <a href="http://ovarianresearch.biomedcentral.com/articles/10.1186/s13048-015-0147-1">http://ovarianresearch.biomedcentral.com/articles/10.1186/s13048-015-0147-1</a>               | 1  | 1 | 0 | <i>Journal of Ovarian Research</i>            | 17/12/2013 | 26/03/2015 | 464  | compromised peer review | Publisher & Editor | 2015 |
| <a href="http://www.eurjmedres.com/content/20/1/33">http://www.eurjmedres.com/content/20/1/33</a>                                                                                   | 1  | 1 | 0 | <i>European Journal of Medical Research</i>   | 21/03/2014 | 26/03/2015 | 370  | compromised peer review | Publisher & Editor | 2015 |
| <a href="http://ovarianresearch.biomedcentral.com/articles/10.1186/s13048-015-0145-3">http://ovarianresearch.biomedcentral.com/articles/10.1186/s13048-015-0145-3</a>               | 1  | 2 | 0 | <i>Journal of Ovarian Research</i>            | 21/01/2014 | 26/03/2015 | 429  | compromised peer review | Publisher & Editor | 2015 |
| <a href="http://bmcmusculoskeletdisord.biomedcentral.com/articles/10.1186/s12891-015-0528-z">http://bmcmusculoskeletdisord.biomedcentral.com/articles/10.1186/s12891-015-0528-z</a> | 2  | 1 | 0 | <i>BMC Musculoskeletal Disorders</i>          | 22/05/2014 | 26/03/2015 | 308  | compromised peer review | Publisher & Editor | 2015 |
| <a href="http://www.jmedicalcasereports.com/content/9/1/70">http://www.jmedicalcasereports.com/content/9/1/70</a>                                                                   | 0  | 1 | 0 | <i>Journal of Medical Case Reports</i>        | 26/03/2014 | 26/03/2015 | 365  | no consent              | Editor             | 2015 |
| <a href="http://bmcgastroenterol.biomedcentral.com/articles/10.1186/s12876-015-0265-7">http://bmcgastroenterol.biomedcentral.com/articles/10.1186/s12876-015-0265-7</a>             | 0  | 1 | 0 | <i>BMC Gastroenterology</i>                   | 03/04/2014 | 26/03/2015 | 357  | compromised peer review | Publisher & Editor | 2015 |
| <a href="http://www.eurjmedres.com/content/20/1/40">http://www.eurjmedres.com/content/20/1/40</a>                                                                                   | 0  | 1 | 0 | <i>European Journal of Medical Research</i>   | 14/12/2013 | 26/03/2015 | 467  | compromised peer review | Publisher & Editor | 2015 |
| <a href="http://www.eurjmedres.com/content/20/1/34">http://www.eurjmedres.com/content/20/1/34</a>                                                                                   | 0  | 1 | 0 | <i>European Journal of Medical Research</i>   | 10/12/2013 | 26/03/2015 | 471  | compromised peer review | Publisher & Editor | 2015 |
| <a href="http://www.eurjmedres.com/content/20/1/39">http://www.eurjmedres.com/content/20/1/39</a>                                                                                   | 4  | 6 | 0 | <i>European Journal of Medical Research</i>   | 06/12/2013 | 26/03/2015 | 475  | compromised peer review | Publisher & Editor | 2015 |

|                                                                                                                                                                               |    |   |   |                                             |            |            |     |                         |                    |      |
|-------------------------------------------------------------------------------------------------------------------------------------------------------------------------------|----|---|---|---------------------------------------------|------------|------------|-----|-------------------------|--------------------|------|
| <a href="http://www.eurimedres.com/content/20/1/37">http://www.eurimedres.com/content/20/1/37</a>                                                                             | 0  | 1 | 0 | European Journal of Medical Research        | 29/10/2014 | 26/03/2015 | 148 | compromised peer review | Publisher & Editor | 2015 |
| <a href="http://diagnosticpathology.biomedcentral.com/articles/10.1186/s13000-015-0238-8">http://diagnosticpathology.biomedcentral.com/articles/10.1186/s13000-015-0238-8</a> | 14 | 7 | 0 | Diagnostic Pathology                        | 21/10/2013 | 26/03/2015 | 521 | compromised peer review | Publisher & Editor | 2015 |
| <a href="http://www.eurimedres.com/content/20/1/43">http://www.eurimedres.com/content/20/1/43</a>                                                                             | 0  | 1 | 0 | European Journal of Medical Research        | 01/09/2013 | 26/03/2015 | 571 | compromised peer review | Publisher & Editor | 2015 |
| <a href="http://www.eurimedres.com/content/20/1/32">http://www.eurimedres.com/content/20/1/32</a>                                                                             | 1  | 1 | 0 | European Journal of Medical Research        | 27/12/2013 | 26/03/2015 | 454 | compromised peer review | Publisher & Editor | 2015 |
| <a href="http://www.eurimedres.com/content/20/1/36">http://www.eurimedres.com/content/20/1/36</a>                                                                             | 1  | 1 | 0 | European Journal of Medical Research        | 29/05/2014 | 26/03/2015 | 301 | compromised peer review | Publisher & Editor | 2015 |
| <a href="http://wjso.biomedcentral.com/articles/10.1186/s12957-015-0547-0">http://wjso.biomedcentral.com/articles/10.1186/s12957-015-0547-0</a>                               | 4  | 4 | 0 | World Journal of Surgical Oncology          | 10/12/2013 | 26/03/2015 | 471 | compromised peer review | Publisher & Editor | 2015 |
| <a href="http://diagnosticpathology.biomedcentral.com/articles/10.1186/s13000-015-0241-0">http://diagnosticpathology.biomedcentral.com/articles/10.1186/s13000-015-0241-0</a> | 1  | 1 | 0 | Diagnostic Pathology                        | 26/09/2014 | 26/03/2015 | 181 | compromised peer review | Publisher & Editor | 2015 |
| <a href="http://ovarianresearch.biomedcentral.com/articles/10.1186/s13048-015-0144-4">http://ovarianresearch.biomedcentral.com/articles/10.1186/s13048-015-0144-4</a>         | 0  | 3 | 0 | Journal of Ovarian Research                 | 30/09/2014 | 26/03/2015 | 177 | compromised peer review | Publisher & Editor | 2015 |
| <a href="http://bmccancer.biomedcentral.com/articles/10.1186/s12885-015-1162-8">http://bmccancer.biomedcentral.com/articles/10.1186/s12885-015-1162-8</a>                     | 3  | 3 | 0 | BMC Cancer                                  | 16/01/2014 | 26/03/2015 | 434 | compromised peer review | Publisher & Editor | 2015 |
| <a href="http://bmccardiovascdisord.biomedcentral.com/articles/10.1186/s12872-015-0019-z">http://bmccardiovascdisord.biomedcentral.com/articles/10.1186/s12872-015-0019-z</a> | 2  | 2 | 0 | BMC Cardiovascular Disorders                | 17/04/2014 | 26/03/2015 | 343 | compromised peer review | Publisher & Editor | 2015 |
| <a href="http://josr-online.biomedcentral.com/articles/10.1186/s13018-015-0183-y">http://josr-online.biomedcentral.com/articles/10.1186/s13018-015-0183-y</a>                 | 3  | 1 | 0 | Journal of Orthopaedic Surgery and Research | 11/04/2014 | 26/03/2015 | 349 | compromised peer review | Publisher & Editor | 2015 |
| <a href="http://josr-online.biomedcentral.com/articles/10.1186/s13018-015-0180-1">http://josr-online.biomedcentral.com/articles/10.1186/s13018-015-0180-1</a>                 | 1  | 1 | 0 | Journal of Orthopaedic Surgery and Research | 16/08/2014 | 26/03/2015 | 222 | compromised peer review | Publisher & Editor | 2015 |
| <a href="http://josr-online.biomedcentral.com/articles/10.1186/s13018-015-0179-7">http://josr-online.biomedcentral.com/articles/10.1186/s13018-015-0179-7</a>                 | 0  | 1 | 0 | Journal of Orthopaedic Surgery and Research | 10/03/2014 | 26/03/2015 | 381 | compromised peer review | Publisher & Editor | 2015 |

|                                                                                                                                                                               |   |   |   |                                             |            |            |     |                         |                    |      |
|-------------------------------------------------------------------------------------------------------------------------------------------------------------------------------|---|---|---|---------------------------------------------|------------|------------|-----|-------------------------|--------------------|------|
| <a href="http://bmcneurol.biomedcentral.com/articles/10.1186/s12883-015-0307-3">http://bmcneurol.biomedcentral.com/articles/10.1186/s12883-015-0307-3</a>                     | 3 | 1 | 0 | BMC Neurology                               | 20/11/2013 | 26/03/2015 | 491 | compromised peer review | Publisher & Editor | 2015 |
| <a href="http://www.eurimedres.com/content/20/1/38">http://www.eurimedres.com/content/20/1/38</a>                                                                             | 3 | 2 | 0 | European Journal of Medical Research        | 20/12/2013 | 26/03/2015 | 461 | compromised peer review | Publisher & Editor | 2015 |
| <a href="http://www.eurimedres.com/content/20/1/30">http://www.eurimedres.com/content/20/1/30</a>                                                                             | 2 | 1 | 0 | European Journal of Medical Research        | 04/10/2013 | 26/03/2015 | 538 | compromised peer review | Publisher & Editor | 2015 |
| <a href="http://www.eurimedres.com/content/20/1/35">http://www.eurimedres.com/content/20/1/35</a>                                                                             | 6 | 2 | 0 | European Journal of Medical Research        | 17/12/2013 | 26/03/2015 | 464 | compromised peer review | Publisher & Editor | 2015 |
| <a href="http://www.eurimedres.com/content/20/1/42">http://www.eurimedres.com/content/20/1/42</a>                                                                             | 2 | 5 | 0 | European Journal of Medical Research        | 23/04/2014 | 26/03/2015 | 337 | compromised peer review | Publisher & Editor | 2015 |
| <a href="http://www.eurimedres.com/content/20/1/31">http://www.eurimedres.com/content/20/1/31</a>                                                                             | 2 | 1 | 0 | European Journal of Medical Research        | 14/11/2013 | 26/03/2015 | 497 | compromised peer review | Publisher & Editor | 2015 |
| <a href="http://www.eurimedres.com/content/20/1/41">http://www.eurimedres.com/content/20/1/41</a>                                                                             | 0 | 3 | 0 | European Journal of Medical Research        | 20/08/2014 | 26/03/2015 | 218 | compromised peer review | Publisher & Editor | 2015 |
| <a href="http://diagnosticpathology.biomedcentral.com/articles/10.1186/s13000-015-0236-x">http://diagnosticpathology.biomedcentral.com/articles/10.1186/s13000-015-0236-x</a> | 3 | 1 | 0 | Diagnostic Pathology                        | 23/08/2013 | 26/03/2015 | 580 | compromised peer review | Publisher & Editor | 2015 |
| <a href="http://iosr-online.biomedcentral.com/articles/10.1186/s13018-015-0176-x">http://iosr-online.biomedcentral.com/articles/10.1186/s13018-015-0176-x</a>                 | 1 | 2 | 0 | Journal of Orthopaedic Surgery and Research | 15/04/2014 | 26/03/2015 | 345 | compromised peer review | Publisher & Editor | 2015 |
| <a href="http://iosr-online.biomedcentral.com/articles/10.1186/s13018-015-0182-z">http://iosr-online.biomedcentral.com/articles/10.1186/s13018-015-0182-z</a>                 | 0 | 1 | 0 | Journal of Orthopaedic Surgery and Research | 12/12/2014 | 26/03/2015 | 104 | compromised peer review | Publisher & Editor | 2015 |
| <a href="http://iosr-online.biomedcentral.com/articles/10.1186/s13018-015-0178-8">http://iosr-online.biomedcentral.com/articles/10.1186/s13018-015-0178-8</a>                 | 1 | 1 | 0 | Journal of Orthopaedic Surgery and Research | 23/04/2014 | 26/03/2015 | 337 | compromised peer review | Publisher & Editor | 2015 |
| <a href="http://iosr-online.biomedcentral.com/articles/10.1186/s13018-015-0181-0">http://iosr-online.biomedcentral.com/articles/10.1186/s13018-015-0181-0</a>                 | 0 | 1 | 0 | Journal of Orthopaedic Surgery and Research | 17/03/2014 | 26/03/2015 | 374 | compromised peer review | Publisher & Editor | 2015 |

|                                                                                                                                                                       |               |    |   |                                             |            |            |      |                                 |                    |      |
|-----------------------------------------------------------------------------------------------------------------------------------------------------------------------|---------------|----|---|---------------------------------------------|------------|------------|------|---------------------------------|--------------------|------|
| <a href="http://www.eurjmedres.com/content/20/1/29">http://www.eurjmedres.com/content/20/1/29</a>                                                                     | 1             | 1  | 0 | European Journal of Medical Research        | 16/09/2014 | 26/03/2015 | 191  | compromised peer review         | Publisher & Editor | 2015 |
| <a href="http://ovarianresearch.biomedcentral.com/articles/10.1186/s13048-015-0146-2">http://ovarianresearch.biomedcentral.com/articles/10.1186/s13048-015-0146-2</a> | 3             | 6  | 1 | Journal of Ovarian Research                 | 06/12/2013 | 26/03/2015 | 475  | compromised peer review         | Publisher & Editor | 2015 |
| <a href="http://josr-online.biomedcentral.com/articles/10.1186/s13018-015-0177-9">http://josr-online.biomedcentral.com/articles/10.1186/s13018-015-0177-9</a>         | 0             | 0  | 0 | Journal of Orthopaedic Surgery and Research | 21/02/2014 | 26/03/2015 | 398  | compromised peer review         | Publisher & Editor | 2015 |
| <a href="http://bmcsurg.biomedcentral.com/articles/10.1186/1471-2482-15-2">http://bmcsurg.biomedcentral.com/articles/10.1186/1471-2482-15-2</a>                       | 14            | 2  | 0 | BMC Surgery                                 | 08/10/2013 | 14/01/2015 | 463  | plagiarism                      | authors            | 2015 |
| <a href="http://www.biomedcentral.com/1756-0500/7/868">http://www.biomedcentral.com/1756-0500/7/868</a>                                                               | 0             | 3  | 0 | BMC Research Notes                          | 21/01/2014 | 25/11/2014 | 308  | no ethical approval             | editor             | 2014 |
| <a href="http://www.annals-general-psychiatry.com/content/13/1/30">http://www.annals-general-psychiatry.com/content/13/1/30</a>                                       | 0             | 1  | 0 | Annals of General Psychiatry                | 12/04/2014 | 26/11/2014 | 228  | plagiarism                      | authors            | 2014 |
| <a href="http://www.translationalneurodegeneration.com/content/3/1/22">http://www.translationalneurodegeneration.com/content/3/1/22</a>                               | 1             | 2  | 0 | Translational Neurodegeneration             | 27/08/2014 | 03/10/2014 | 37   | undeclared conflict of interest | Editor             | 2014 |
| <a href="http://www.nutritionandmetabolism.com/content/11/1/43">http://www.nutritionandmetabolism.com/content/11/1/43</a>                                             | 0             | 2  | 0 | Nutrition & Metabolism                      | 06/06/2014 | 24/09/2014 | 110  | plagiarism                      | editor             | 2014 |
| <a href="http://www.biomedcentral.com/1752-0509/8/105">http://www.biomedcentral.com/1752-0509/8/105</a>                                                               | 13            | 8  | 0 | BMC Systems Biology                         | 21/03/2012 | 18/09/2014 | 911  | compromised peer review         | editor             | 2014 |
| <a href="http://www.biomedcentral.com/1471-2393/14/202">http://www.biomedcentral.com/1471-2393/14/202</a>                                                             | 1             | 4  | 2 | BMC Pregnancy and Childbirth                | 12/08/2013 | 03/07/2014 | 325  | data unreliable                 | authors            | 2014 |
| <a href="http://www.dmsjournal.com/content/6/1/60">http://www.dmsjournal.com/content/6/1/60</a>                                                                       | 2             | 7  | 0 | Diabetology & Metabolic Syndrome            | 02/09/2013 | 27/05/2014 | 267  | plagiarism                      | editor             | 2014 |
| <a href="http://www.dmsjournal.com/content/6/1/59">http://www.dmsjournal.com/content/6/1/59</a>                                                                       | 2             | 3  | 0 | Diabetology & Metabolic Syndrome            | 01/05/2013 | 27/05/2014 | 391  | plagiarism                      | editor             | 2014 |
| <a href="http://www.molecularpain.com/content/10/1/20">http://www.molecularpain.com/content/10/1/20</a>                                                               | 8             | 2  | 0 | Molecular Pain                              | 11/01/2012 | 02/04/2014 | 812  | data fabrication                | authors            | 2014 |
| <a href="http://www.ijonline.net/content/40/1/9">http://www.ijonline.net/content/40/1/9</a>                                                                           | 7             | 5  | 0 | Italian Journal of Pediatrics               | 23/07/2012 | 11/03/2014 | 596  | plagiarism                      | authors            | 2014 |
| <a href="http://www.nutritionandmetabolism.com/content/11/1/11">http://www.nutritionandmetabolism.com/content/11/1/11</a>                                             | 32            | 14 | 1 | Nutrition & Metabolism                      | 18/10/2008 | 14/02/2014 | 1945 | plagiarism                      | editor             | 2014 |
| <a href="http://www.retrovirology.com/content/11/1/16">http://www.retrovirology.com/content/11/1/16</a>                                                               | not in scopus | ?  | 0 | Retrovirology                               | 13/09/2012 | 06/02/2014 | 511  | data fabrication                | authors            | 2014 |
| <a href="http://www.biomedcentral.com/1472-6793/13/13">http://www.biomedcentral.com/1472-6793/13/13</a>                                                               | 17            | 3  | 0 | BMC Physiology                              | 12/05/2010 | 10/01/2014 | 1339 | data fabrication                | authors            | 2014 |
| <a href="http://www.biomedical-engineering-online.com/content/12/1/113">http://www.biomedical-engineering-online.com/content/12/1/113</a>                             | 7             | 2  | 0 | BioMedical Engineering OnLine               | 05/05/2004 | 06/12/2013 | 3502 | image duplication               | publisher          | 2013 |

|                                                                                                                                           |               |    |   |                                                      |            |            |     |                                 |            |      |
|-------------------------------------------------------------------------------------------------------------------------------------------|---------------|----|---|------------------------------------------------------|------------|------------|-----|---------------------------------|------------|------|
| <a href="http://www.cancerci.com/content/13/1/96">http://www.cancerci.com/content/13/1/96</a>                                             | 2             | 4  | 0 | <i>Cancer Cell International</i>                     | 29/05/2012 | 22/10/2013 | 511 | data unreliable                 | authors    | 2013 |
| <a href="http://www.biomedcentral.com/1756-0500/6/422">http://www.biomedcentral.com/1756-0500/6/422</a>                                   | 1             | 5  | 0 | <i>BMC Research Notes</i>                            | 23/02/2012 | 18/10/2013 | 603 | no permission for data          | editor     | 2013 |
| <a href="http://www.biomedcentral.com/1756-0500/6/332">http://www.biomedcentral.com/1756-0500/6/332</a>                                   | 0             | 1  | 0 | <i>BMC Research Notes</i>                            | 06/05/2013 | 20/08/2013 | 106 | data unreliable                 | authors    | 2013 |
| <a href="http://www.diagnosticpathology.org/content/8/1/127">http://www.diagnosticpathology.org/content/8/1/127</a>                       | 2             | 13 | 0 | <i>Diagnostic Pathology</i>                          | 07/12/2012 | 14/08/2013 | 250 | plagiarism                      | authors    | 2013 |
| <a href="http://www.aacijournal.com/content/9/1/28">http://www.aacijournal.com/content/9/1/28</a>                                         | not in scopus | ?  | 1 | <i>Allergy, Asthma &amp; Clinical Immunology</i>     | 15/07/2013 | 12/08/2013 | 28  | no permission for data          | authors    | 2013 |
| <a href="http://www.biomedcentral.com/1472-6750/13/57">http://www.biomedcentral.com/1472-6750/13/57</a>                                   | 4             | 5  | 1 | <i>BMC Biotechnology</i>                             | 06/01/2011 | 20/07/2013 | 926 | data fabrication                | authors    | 2013 |
| <a href="http://www.skeletalmusclejournal.com/content/3/1/15">http://www.skeletalmusclejournal.com/content/3/1/15</a>                     | ?             | ?  | 0 | <i>Skeletal Muscle</i>                               | 27/04/2012 | 18/07/2013 | 447 | data unreliable                 | authors    | 2013 |
| <a href="http://www.translational-medicine.com/content/11/1/144">http://www.translational-medicine.com/content/11/1/144</a>               | 0             | 8  | 0 | <i>Journal of Translational Medicine</i>             | 05/12/2012 | 11/06/2013 | 188 | published in error              | publisher  | 2013 |
| <a href="http://www.biomedcentral.com/1472-6963/13/180">http://www.biomedcentral.com/1472-6963/13/180</a>                                 | 0             | 1  | 0 | <i>BMC Health Services Research</i>                  | 21/12/2012 | 20/05/2013 | 150 | no permission for data          | authors    | 2013 |
| <a href="http://www.jdmdonline.com/content/12/1/21">http://www.jdmdonline.com/content/12/1/21</a>                                         | 0             | 2  | 0 | <i>Journal of Diabetes &amp; Metabolic Disorders</i> | 22/12/2012 | 14/05/2013 | 143 | published in error              | publisher  | 2013 |
| <a href="http://www.scoliosisjournal.com/content/8/1/7">http://www.scoliosisjournal.com/content/8/1/7</a>                                 | 0             | 2  | 0 | <i>Scoliosis</i>                                     | 28/05/2012 | 03/05/2013 | 340 | undeclared conflict of interest | editor     | 2013 |
| <a href="http://www.proteomesci.com/content/11/1/16">http://www.proteomesci.com/content/11/1/16</a>                                       | 5             | 3  | 0 | <i>Proteome Science</i>                              | 02/06/2011 | 23/04/2013 | 691 | plagiarism                      | editor     | 2013 |
| <a href="http://www.jdmdonline.com/content/11/1/21">http://www.jdmdonline.com/content/11/1/21</a>                                         | 0             | 2  | 6 | <i>Journal of Diabetes &amp; Metabolic Disorders</i> | 24/08/2012 | 07/03/2013 | 195 | duplicate publication           | not stated | 2013 |
| <a href="http://www.jasbsci.com/content/4/1/3">http://www.jasbsci.com/content/4/1/3</a>                                                   | 0             | 21 | 0 | <i>Journal of Animal Science and Biotechnology</i>   | 22/08/2012 | 23/01/2013 | 154 | plagiarism                      | authors    | 2013 |
| <a href="http://www.biomedcentral.com/1472-6882/12/206">http://www.biomedcentral.com/1472-6882/12/206</a>                                 | 1             | 22 | 0 | <i>BMC Complementary and Alternative Medicine</i>    | 20/09/2011 | 02/11/2012 | 409 | plagiarism                      | journal    | 2012 |
| <a href="http://breast-cancer-research-misconduct.com/content/14/5/402">http://breast-cancer-research-misconduct.com/content/14/5/402</a> | 0             | 9  | 1 | <i>Breast Cancer Research</i>                        | 06/03/2012 | 31/10/2012 | 239 | data unreliable                 | authors    | 2012 |
| <a href="http://www.gvt-journal.com/content/10/1/10">http://www.gvt-journal.com/content/10/1/10</a>                                       | 0             | 0  | 1 | <i>Genetic Vaccines and Therapy</i>                  | 20/06/2012 | 23/10/2012 | 125 | undeclared conflict of interest | editor     | 2012 |

|                                                                                                                       |               |    |   |                                                               |            |            |      |                     |            |      |
|-----------------------------------------------------------------------------------------------------------------------|---------------|----|---|---------------------------------------------------------------|------------|------------|------|---------------------|------------|------|
| <a href="http://www.jnanobiotechnology.com/content/10/1/40">http://www.jnanobiotechnology.com/content/10/1/40</a>     | 0             | 22 | 0 | <i>Journal of Nanobiotechnology</i>                           | 20/07/2012 | 04/10/2012 | 76   | plagiarism          | not stated | 2012 |
| <a href="http://www.wjso.com/content/10/1/196">http://www.wjso.com/content/10/1/196</a>                               | 6             | 17 | 2 | <i>World Journal of Surgical Oncology</i>                     | 30/04/2010 | 20/09/2012 | 874  | plagiarism          | authors    | 2012 |
| <a href="http://www.molecular-cancer.com/content/11/1/57">http://www.molecular-cancer.com/content/11/1/57</a>         | 56            | 30 | 1 | <i>Molecular Cancer</i>                                       | 23/03/2006 | 20/08/2012 | 2342 | plagiarism          | authors    | 2012 |
| <a href="http://www.biomedcentral.com/1471-2121/13/17">http://www.biomedcentral.com/1471-2121/13/17</a>               | 0             | 1  | 0 | <i>BMC Cell Biology</i>                                       | 26/03/2012 | 26/06/2012 | 92   | plagiarism          | editor     | 2012 |
| <a href="http://www.biomedcentral.com/1756-0500/5/319">http://www.biomedcentral.com/1756-0500/5/319</a>               | 0             | 5  | 0 | <i>BMC Research Notes</i>                                     | 20/12/2011 | 21/06/2012 | 184  | published in error  | editor     | 2012 |
| <a href="http://www.celldiv.com/content/7/1/15">http://www.celldiv.com/content/7/1/15</a>                             | 5             | 13 | 0 | <i>Cell Division</i>                                          | 21/01/2010 | 15/05/2012 | 845  | plagiarism          | not stated | 2012 |
| <a href="http://www.ctajournal.com/content/2/1/6">http://www.ctajournal.com/content/2/1/6</a>                         | not in scopus | ?  | ? | <i>Clinical and Translational Allergy</i>                     | 25/08/2011 | 16/03/2012 | 204  | data unreliable     | authors    | 2012 |
| <a href="http://www.jeccr.com/content/31/1/21">http://www.jeccr.com/content/31/1/21</a>                               | 0             | 3  | 0 | <i>Journal of Experimental &amp; Clinical Cancer Research</i> | 10/11/2011 | 13/03/2012 | 124  | data unreliable     | authors    | 2012 |
| <a href="http://www.cardiothoracicsurgery.org/content/7/1/17">http://www.cardiothoracicsurgery.org/content/7/1/17</a> | 1             | 4  | 0 | <i>Journal of Cardiothoracic Surgery</i>                      | 12/05/2011 | 06/03/2012 | 299  | published in error  | editor     | 2012 |
| <a href="http://www.biomedcentral.com/1471-2172/13/3">http://www.biomedcentral.com/1471-2172/13/3</a>                 | 0             | 0  | 0 | <i>BMC Immunology</i>                                         | 11/11/2011 | 16/01/2012 | 66   | data fabrication    | authors    | 2012 |
| <a href="http://www.retrovirology.com/content/8/1/88">http://www.retrovirology.com/content/8/1/88</a>                 | 0             | 4  | 2 | <i>Retrovirology</i>                                          | 06/01/2011 | 05/11/2011 | 303  | image duplication   | authors    | 2011 |
| <a href="http://www.wjso.com/content/9/1/136">http://www.wjso.com/content/9/1/136</a>                                 | 0             | 2  | 1 | <i>World Journal of Surgical Oncology</i>                     | 13/07/2011 | 24/10/2011 | 103  | plagiarism          | authors    | 2011 |
| <a href="http://www.chiromt.com/content/19/1/24">http://www.chiromt.com/content/19/1/24</a>                           | 2             | 1  | 0 | <i>Chiropractic &amp; Manual Therapies</i>                    | 09/08/2010 | 03/10/2011 | 420  | no ethical approval | not stated | 2011 |
| <a href="http://www.biomedcentral.com/1746-6148/7/56">http://www.biomedcentral.com/1746-6148/7/56</a>                 | 0             | 9  | 1 | <i>BMC Veterinary Research</i>                                | 29/04/2011 | 20/09/2011 | 144  | plagiarism          | authors    | 2011 |
| <a href="http://www.biomedcentral.com/1471-2474/12/200">http://www.biomedcentral.com/1471-2474/12/200</a>             | 3             | 6  | 0 | <i>BMC Musculoskeletal Disorders</i>                          | 08/04/2010 | 13/09/2011 | 523  | no ethical approval | not stated | 2011 |
| <a href="http://www.biomedcentral.com/1471-2474/12/158">http://www.biomedcentral.com/1471-2474/12/158</a>             | 4             | 13 | 0 | <i>BMC Musculoskeletal Disorders</i>                          | 17/04/2009 | 13/07/2011 | 817  | no ethical approval | not stated | 2011 |
| <a href="http://www.biomedcentral.com/1471-2474/12/159">http://www.biomedcentral.com/1471-2474/12/159</a>             | 0             | 5  | 0 | <i>BMC Musculoskeletal Disorders</i>                          | 19/10/2010 | 13/07/2011 | 267  | no ethical approval | not stated | 2011 |
| <a href="http://www.biomedcentral.com/1471-2164/12/284">http://www.biomedcentral.com/1471-2164/12/284</a>             | 6             | 25 | 0 | <i>BMC Genomics</i>                                           | 28/09/2009 | 02/06/2011 | 612  | image duplication   | authors    | 2011 |

|                                                                                                                                 |               |    |   |                                                    |            |            |      |                        |            |      |
|---------------------------------------------------------------------------------------------------------------------------------|---------------|----|---|----------------------------------------------------|------------|------------|------|------------------------|------------|------|
| <a href="http://www.biomedcentral.com/1471-2180/11/128">http://www.biomedcentral.com/1471-2180/11/128</a>                       | 7             | 13 | 1 | BMC Microbiology                                   | 12/02/2009 | 02/06/2011 | 840  | image duplication      | editor     | 2011 |
| <a href="http://www.biomedcentral.com/1471-2180/11/127">http://www.biomedcentral.com/1471-2180/11/127</a>                       | 0             | 3  | 0 | BMC Microbiology                                   | 05/01/2010 | 02/06/2011 | 513  | image duplication      | editor     | 2011 |
| <a href="http://www.jeccr.com/content/30/1/19">http://www.jeccr.com/content/30/1/19</a>                                         | 1             | 10 | 1 | Journal of Experimental & Clinical Cancer Research | 11/10/2010 | 16/02/2011 | 128  | plagiarism             | authors    | 2011 |
| <a href="http://www.retrovirology.com/content/8/1/1">http://www.retrovirology.com/content/8/1/1</a>                             | 19            | 10 | 0 | Retrovirology                                      | 09/04/2006 | 06/01/2011 | 1733 | image duplication      | authors    | 2011 |
| <a href="http://www.biomedcentral.com/1472-6939/11/20">http://www.biomedcentral.com/1472-6939/11/20</a>                         | 0             | 3  | 0 | BMC Medical Ethics                                 | 15/09/2010 | 21/12/2010 | 97   | plagiarism             | authors    | 2010 |
| <a href="http://www.parasitesandvectors.com/content/3/1/78">http://www.parasitesandvectors.com/content/3/1/78</a>               | 0             | 2  | 0 | Parasites & Vectors                                | 24/06/2010 | 25/08/2010 | 62   | data unreliable        | editor     | 2010 |
| <a href="http://www.virology.com/content/7/1/190">http://www.virology.com/content/7/1/190</a>                                   | 0             | 1  | 0 | Virology Journal                                   | 21/07/2010 | 13/08/2010 | 23   | data unreliable        | editor     | 2010 |
| <a href="http://www.biomedcentral.com/1471-2105/11/258">http://www.biomedcentral.com/1471-2105/11/258</a>                       | 0             | 1  | 0 | BMC Bioinformatics                                 | 18/01/2010 | 18/05/2010 | 120  | plagiarism             | not stated | 2010 |
| <a href="http://www.cmjournal.org/content/5/1/10">http://www.cmjournal.org/content/5/1/10</a>                                   | 0             | 2  | 0 | Chinese Medicine                                   | 27/11/2009 | 16/03/2010 | 109  | no permission for data | authors    | 2010 |
| <a href="http://www.jmedicalcasereports.com/content/3/1/122">www.jmedicalcasereports.com/content/3/1/122</a>                    | 0             | 4  | 0 | Journal of Medical Case Reports                    | 31/07/2008 | 13/11/2009 | 470  | published in error     | publisher  | 2009 |
| <a href="http://www.molecularneurodegeneration.com/content/4/1/45">http://www.molecularneurodegeneration.com/content/4/1/45</a> | 2             | 6  | 0 | Molecular Neurodegeneration                        | 01/10/2007 | 04/11/2009 | 765  | data unreliable        | authors    | 2009 |
| <a href="http://www.biomedcentral.com/1472-6947/9/45">http://www.biomedcentral.com/1472-6947/9/45</a>                           | 0             | 3  | 0 | BMC Medical Informatics and Decision Making        | 09/11/2007 | 20/10/2009 | 711  | data unreliable        | editor     | 2009 |
| <a href="http://www.microbialcellfactories.com/content/8/1/52">www.microbialcellfactories.com/content/8/1/52</a>                | not in scopus | ?  | ? | Microbial Cell Factories                           | 20/07/2009 | 15/10/2009 | 87   | duplicate publication  | authors    | 2009 |
| <a href="http://www.molecular-cancer.com/content/8/1/84">http://www.molecular-cancer.com/content/8/1/84</a>                     | 0             | 5  | 0 | Molecular Cancer                                   | 27/09/2009 | 14/10/2009 | 17   | duplicate publication  | authors    | 2009 |
| <a href="http://www.jeccr.com/content/28/1/137">http://www.jeccr.com/content/28/1/137</a>                                       | 1             | 8  | 0 | Journal of Experimental & Clinical Cancer Research | 16/07/2009 | 09/10/2009 | 85   | duplicate publication  | authors    | 2009 |
| <a href="http://www.jeccr.com/content/28/1/101">http://www.jeccr.com/content/28/1/101</a>                                       | 2             | 14 | 0 | Journal of Experimental & Clinical Cancer Research | 12/08/2008 | 16/07/2009 | 338  | duplicate publication  | authors    | 2009 |
| <a href="http://www.issoonline.com/content/6/1/11">http://www.issoonline.com/content/6/1/11</a>                                 | 0             | 3  | 0 | International Seminars in Surgical Oncology        | 05/02/2009 | 17/04/2009 | 71   | co-authors unaware     | authors    | 2009 |



|                                                                                                                                                                                                                                                   |   |    |   |                                                    |            |            |     |                        |           |      |
|---------------------------------------------------------------------------------------------------------------------------------------------------------------------------------------------------------------------------------------------------|---|----|---|----------------------------------------------------|------------|------------|-----|------------------------|-----------|------|
| <a href="http://www.hqlo.com/content/7/1/34">http://www.hqlo.com/content/7/1/34</a>                                                                                                                                                               | 0 | 4  | 1 | <i>Health and Quality of Life Outcomes</i>         | 30/01/2009 | 17/04/2009 | 77  | data unreliable        | authors   | 2009 |
| <a href="http://www.biomedcentral.com/1471-2342/8/15">http://www.biomedcentral.com/1471-2342/8/15</a>                                                                                                                                             | 0 | 4  | 2 | <i>BMC Medical Imaging</i>                         | 31/01/2007 | 11/08/2008 | 558 | no permission for data | authors   | 2008 |
| <a href="http://www.jautoimdis.com/content/5/1/5">http://www.jautoimdis.com/content/5/1/5</a>                                                                                                                                                     | 0 | 12 | 0 | <i>Journal of Autoimmune Diseases</i>              | 29/07/2008 | 11/08/2008 | 13  | published in error     | publisher | 2008 |
| <a href="http://www.carcinogenesis.com/article.asp?issn=1477-3163;year=2008;volume=7;issue=1;spage=4;epage=4;aulast=Weiner">http://www.carcinogenesis.com/article.asp?issn=1477-3163;year=2008;volume=7;issue=1;spage=4;epage=4;aulast=Weiner</a> | 0 | 4  | 0 | <i>Journal of Carcinogenesis</i>                   | 28/07/2008 | 08/08/2008 | 11  | published in error     | publisher | 2008 |
| <a href="http://www.virologyj.com/content/4/1/119">http://www.virologyj.com/content/4/1/119</a>                                                                                                                                                   | 0 | 6  | 0 | <i>Virology Journal</i>                            | 24/09/2007 | 31/10/2007 | 37  | co-authors unaware     | authors   | 2007 |
| <a href="http://www.iosr-online.com/content/2/1/6">http://www.iosr-online.com/content/2/1/6</a>                                                                                                                                                   | 0 | 4  | 1 | <i>Journal of Orthopaedic Surgery and Research</i> | 02/11/2006 | 04/04/2007 | 153 | duplicate publication  | authors   | 2007 |
| <a href="http://www.cardiovascularultrasound.com/content/4/1/42">http://www.cardiovascularultrasound.com/content/4/1/42</a>                                                                                                                       | 0 | 6  | 0 | <i>Cardiovascular Ultrasound</i>                   | 16/10/2006 | 08/11/2006 | 23  | duplicate publication  | authors   | 2006 |
| <a href="http://www.molecular-cancer.com/content/4/1/17">http://www.molecular-cancer.com/content/4/1/17</a>                                                                                                                                       | 0 | 3  | 2 | <i>Molecular Cancer</i>                            | 05/04/2005 | 06/05/2005 | 31  | co-authors unaware     | authors   | 2005 |
| <a href="http://www.molecular-cancer.com/content/3/1/1">http://www.molecular-cancer.com/content/3/1/1</a>                                                                                                                                         | 0 | 10 | 0 | <i>Molecular Cancer</i>                            | 23/09/2003 | 14/01/2004 | 113 | co-authors unaware     | authors   | 2004 |
| <a href="http://www.molecular-cancer.com/content/3/1/2">http://www.molecular-cancer.com/content/3/1/2</a>                                                                                                                                         | 0 | 6  | 0 | <i>Molecular Cancer</i>                            | 07/08/2003 | 14/01/2004 | 160 | co-authors unaware     | authors   | 2004 |
| <a href="http://www.molecular-cancer.com/content/2/1/17">http://www.molecular-cancer.com/content/2/1/17</a>                                                                                                                                       | 0 | 10 | 0 | <i>Molecular Cancer</i>                            | 03/01/2003 | 03/03/2003 | 59  | duplicate publication  | authors   | 2003 |
